# Supplementary material for: Prognostic Relevance of NPM1 and FLT3 Mutations in Acute Myeloid Leukaemia, Longterm Follow-Up—A Single Center Experience
Source: MDPI journal article supplement (doi:10.3390/cancers14194716), 2022-09-28
Supplement: s1 [file s1]

# NILG-AML 00-01 Study

## High Risk (HR):

- Late CR
- FLT3 ITD +
- K adverse
- S-AML

**HR**

**Allo SCT**

**ICE**

CR

**IC**

NR

**SPLIT**

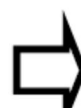

**A8**

SC harvest

**SR**

no SC  
harvest

**A20**

**A20**

**A20**

SC

SC

SC

CD34+:  $1-2 \times 10^6/\text{kg}$ ,  
G-CSF

**A10**

**A10**

## ICE:

Idarubicin 12 mg/sqm dd 1-3

Ara-C 100mg/sqm/bd dd 1-7

VP16 100mg/sqm/bd dd 1-5

## IC:

Idarubicin 10mg/sqm dd 1-3

Ara-C 100mg/sqm/bd dd 1-7

## SPLIT:

Idarubicin 17.5 mg/sqm dd 1,8

Ara-C 3\* g/sqm/bd dd 2,3 and 9,10

\*2 >55 yy

## A8:

Ara-C 1g/sqm/bd dd 1-4

**A10:** Idarubicin 8 mg/sqm d 1

Ara-C 1g/sqm/bd dd 1-5

**A20:** Idarubicin 10 mg/sqm dd 1,2

Ara-C 2g/sqm/bd dd 1-5

>70yy: HDAC at reduced dose (total dose 38g/sqm or 54g/sqm)

Figure S1. Treatment Plan.

**Table S1.** Characteristics of 366 AML patients, incidence of molecular mutations (*NPM1* and *FLT3*).

| Overall                        |                                    | Number (%)     |
|--------------------------------|------------------------------------|----------------|
|                                |                                    | 366            |
| Sex                            | male                               | 203 (55.5)     |
|                                | female                             | 163 (44.5)     |
| <i>NPM1</i>                    | mutated                            | 132/327 (40.4) |
|                                | unmutated                          | 195/327 (59.6) |
|                                | not available                      | 39/366 (10.6)  |
| <i>FLT3</i>                    | mutated                            | 98/352 (27.8)  |
| <i>FLT3</i> -ITD               | mutated                            | 65/352 (18.5)  |
|                                | unmutated                          | 287/352 (81.5) |
|                                | not available                      | 14/366 (3.8)   |
| <i>FLT3</i> -TKD               | mutated                            | 33/316 (10.4)  |
|                                | unmutated                          | 28/316 (8.9)   |
|                                | not available                      | 50/366 (13.6)  |
| <i>NPM1/FLT3</i> -ITD          | <i>NPM1</i> m/ <i>FLT3</i> -ITD wt | 73/138 (52.9)  |
|                                | <i>NPM1</i> m/ <i>FLT3</i> -ITD m  | 38/138 (27.5)  |
|                                | <i>NPM1</i> wt/ <i>FLT3</i> -ITD m | 27/138 (18.6)  |
|                                | favorable                          | 38 (10.4)      |
| Karyotype Risk Classification* | intermediate                       | 265 (72.4)     |
|                                | adverse                            | 59 (16.1)      |
|                                | not available                      | 4 (1.1)        |

Abbreviations: wt: wild-type; m: mutated.

Notes: \*according to MRC [22].
